# Supplementary material for: Membrane technology for water reuse in decentralised non-sewered sanitation systems: comparison of pressure driven (reverse osmosis) and thermally driven processes (membrane distillation and pervaporation)
Source: Royal Society of Chemistry journal article supplement (doi:10.1039/d4ew00200h), 2024-01-01
Supplement: d4ew00200h1.pdf [file d4ew00200h1.pdf]

**Membrane technology for water reuse in decentralised non-sewered sanitation systems: Comparison of pressure driven (Reverse Osmosis) and thermally driven processes (Membrane Distillation and Pervaporation)**

E. Mercer<sup>a,b</sup>, C. Davey<sup>a</sup>, Y. Bajón Fernández<sup>a</sup>, S. Septien<sup>b</sup>, S. Tyrrel<sup>a</sup>, E. Cartmell<sup>c</sup>, M. Pidou<sup>a</sup>,  
E.J. McAdam<sup>a,\*</sup>

<sup>a</sup>Cranfield Water Science Institute, Vincent Building, Cranfield University, Bedfordshire, UK

<sup>b</sup>WASH R&D Centre, School of Engineering, University of KwaZulu-Natal, Durban, 4041, South Africa

<sup>c</sup>Scottish Water, Castle House, Carnegie Campus, Dunfermline, UK

\*Corresponding author e-mail: [e.mcadam@cranfield.ac.uk](mailto:e.mcadam@cranfield.ac.uk)

**Supplementary information**

Table S1. VOC chemical parameters

| Functional group                                                                           | Alcohols                                                                          | Aldehydes                                                                         | Esters                                                                             |                                                                                     | Ketones                                                                             | Aromatic heterocycles                                                               |                                                                                     | Phenol                                                                              | Sulphur                                                                             |
|--------------------------------------------------------------------------------------------|-----------------------------------------------------------------------------------|-----------------------------------------------------------------------------------|------------------------------------------------------------------------------------|-------------------------------------------------------------------------------------|-------------------------------------------------------------------------------------|-------------------------------------------------------------------------------------|-------------------------------------------------------------------------------------|-------------------------------------------------------------------------------------|-------------------------------------------------------------------------------------|
| Compound                                                                                   | 1-Butanol                                                                         | Benzaldehyde                                                                      | Ethyl butyrate                                                                     | Ethyl propionate                                                                    | 2-Butanone                                                                          | Indole                                                                              | Skatole                                                                             | <i>p</i> -Cresol                                                                    | Dimethyl disulfide                                                                  |
| Chemical structure                                                                         | 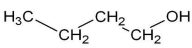 |  |  |  |  |  |  |  |  |
| Molecular weight <sup>a</sup><br>(g mol <sup>-1</sup> )                                    | 74.12                                                                             | 106.12                                                                            | 116.16                                                                             | 102.13                                                                              | 72.11                                                                               | 117.15                                                                              | 131.17                                                                              | 108.14                                                                              | 94.19                                                                               |
| Acid dissociation constant<br>(pKa)                                                        | 16.1 <sup>a</sup>                                                                 | 14.9 <sup>a</sup>                                                                 | -7 <sup>b</sup>                                                                    | -7 <sup>b</sup>                                                                     | 14.7 <sup>a</sup>                                                                   | -2.4 <sup>c</sup>                                                                   | -3.4 <sup>c</sup>                                                                   | 10.26 <sup>a</sup>                                                                  | NA                                                                                  |
| Hydrophobicity <sup>a</sup><br>(logK <sub>ow</sub> at 20 °C)                               | 0.88                                                                              | 1.48                                                                              | 1.85                                                                               | 1.21                                                                                | 0.29                                                                                | 2.14                                                                                | 2.6                                                                                 | 1.94                                                                                | 1.77                                                                                |
| Water solubility<br>(g L <sup>-1</sup> at 25 °C)                                           | 63.2 <sup>a</sup>                                                                 | 6.95 <sup>a</sup>                                                                 | 2.7 <sup>b</sup>                                                                   | 19.2 <sup>a</sup>                                                                   | 223 <sup>a</sup>                                                                    | 3.56 <sup>a</sup>                                                                   | 0.498 <sup>a</sup>                                                                  | 21.5                                                                                | 3                                                                                   |
| Henry's volatility constant <sup>d</sup><br>(mol m <sup>-3</sup> Pa <sup>-1</sup> at 25°C) | 1.2                                                                               | 0.38                                                                              | 0.029                                                                              | 0.041                                                                               | 8.1                                                                                 | 19.1                                                                                | 4.7                                                                                 | 10 <sup>c</sup>                                                                     | 0.0065 <sup>a</sup>                                                                 |
| Boiling point <sup>a</sup><br>(°C)                                                         | 111.7                                                                             | 179                                                                               | 121                                                                                | 99.2                                                                                | 79.59                                                                               | 254                                                                                 | 265                                                                                 | 201.9                                                                               | 110                                                                                 |
| Vapour pressure <sup>a</sup><br>(mm Hg at 25 °C)                                           | 7                                                                                 | 1.27                                                                              | 14                                                                                 | 35.8                                                                                | 90.6                                                                                | 0.0122                                                                              | 0.0055                                                                              | 0.11                                                                                | 28.7                                                                                |
| Molar volume <sup>e</sup><br>(cm <sup>3</sup> )                                            | 92.1                                                                              | 101.1                                                                             | 131.1                                                                              | 114.6                                                                               | 91.7                                                                                | 101.9                                                                               | 118.1                                                                               | 104.1                                                                               | 89.5                                                                                |
| Hansen solubility $\delta$<br>(MPa m <sup>-1/2</sup> )                                     | 23.1                                                                              | 21.5                                                                              | 17.4                                                                               | 17.9                                                                                | 19                                                                                  | 22.14                                                                               | 22.1                                                                                | 22.7                                                                                | 20.4                                                                                |
| Polar surface area <sup>e</sup><br>(Å <sup>2</sup> )                                       | 20                                                                                | 17                                                                                | 26                                                                                 | 26                                                                                  | 17                                                                                  | 16                                                                                  | 16                                                                                  | 20                                                                                  | 51                                                                                  |
| Odour descriptor <sup>a</sup>                                                              | Alcohol like                                                                      | Bitter almond                                                                     | Pineapple                                                                          | Fruity, rum                                                                         | Acetone like                                                                        | Faecal                                                                              | Faecal, nauseating                                                                  | Sweet, tar like                                                                     | Rotten cabbage                                                                      |

<sup>a</sup> Pubchem (2017), <sup>b</sup> YMDB (2017), <sup>c</sup> Gu and Berry (1991), <sup>d</sup> Sander (2015), <sup>e</sup> ChemSpider (2017), <sup>f</sup> Hansen (2007). NA, not available.

Table S2. Average volatile organic compound (VOC) mass balance recoveries from the hydrophilic membrane trials.

| VOC                | Reverse Osmosis (Polyamide-urea) |       | Pervaporation (Polyvinyl alcohol) |       |
|--------------------|----------------------------------|-------|-----------------------------------|-------|
|                    | Average (%)                      | ±     | Average (%)                       | ±     |
| 2-Butanone         | 110.20                           | 4.96  | 98.04                             | 4.29  |
| 1-Butanol          | 105.62                           | 4.61  | 102.87                            | 5.54  |
| Ethyl propionate   | 105.06                           | 6.07  | 98.67                             | 4.99  |
| Dimethyl disulfide | 110.98                           | 5.65  | 98.20                             | 13.81 |
| Ethyl butyrate     | 103.95                           | 0.65  | 102.88                            | 11.02 |
| Benzaldehyde       | 103.23                           | 4.23  | 98.64                             | 9.53  |
| p-Cresol           | 98.27                            | 10.34 | 93.12                             | 8.97  |
| Indole             | 92.76                            | 12.30 | 95.05                             | 7.55  |
| Skatole            | 96.67                            | 12.48 | 92.80                             | 7.99  |

± represents the standard deviation of a triplicated experiment.

Table S3. Feed water characterisation for urine and concentrated blackwater (9:1, urine:faeces by mass) from this study.

| Parameter    | COD (Urine)       | COD (CB)          | TSS (CB)          | TP (Urine)         | TP (CB)            | NH <sub>4</sub> <sup>+</sup> -N (Urine) | NH <sub>4</sub> <sup>+</sup> -N (CB) | C (Urine)           | C (CB)              | E-coli (CB)            | Other coliforms (CB)   | Total coliforms (CB)   | pH (Urine) | pH (CB) |
|--------------|-------------------|-------------------|-------------------|--------------------|--------------------|-----------------------------------------|--------------------------------------|---------------------|---------------------|------------------------|------------------------|------------------------|------------|---------|
| Unit         | g L <sup>-1</sup> | g L <sup>-1</sup> | g L <sup>-1</sup> | mg L <sup>-1</sup> | mg L <sup>-1</sup> | mg L <sup>-1</sup>                      | mg L <sup>-1</sup>                   | mS cm <sup>-1</sup> | mS cm <sup>-1</sup> | CFU mL <sup>-1</sup>   | CFU mL <sup>-1</sup>   | CFU mL <sup>-1</sup>   | pH         | pH      |
| RO (PA-UREA) | 4.01              | 13.63             | 6.12              | 165.00             | 156.80             | 195.50                                  | 1788.50                              | 10.37               | 13.80               | 6.36 x 10 <sup>6</sup> | ND                     | 6.36 x 10 <sup>6</sup> | 6.94       | 9.00    |
|              | ±                 | ±                 | ±                 | ±                  | ±                  | ±                                       | ±                                    | ±                   | ±                   | ±                      |                        | ±                      | ±          | ±       |
| PV (PVA)     | 0.16              | 1.06              | 2.33              | 49.50              | 20.8               | 30.40                                   | 163.90                               | 2.50                | 2.55                | 6.93 x 10 <sup>6</sup> | 2.18 x 10 <sup>6</sup> | 6.93 x 10 <sup>6</sup> | 0.32       | 0.30    |
|              | ±                 | ±                 | ±                 | ±                  | ±                  | ±                                       | ±                                    | ±                   | ±                   | ±                      |                        | ±                      | ±          | ±       |
| PV (PDMS)    | 2.93              | 15.43             | 5.44              | 90.67              | 237.35             | 88.67                                   | 290.03                               | 5.92                | 7.77                | 1.81 x 10 <sup>7</sup> | 2.25 x 10 <sup>5</sup> | 2.01 x 10 <sup>7</sup> | 6.86       | 9.08    |
|              | ±                 | ±                 | ±                 | ±                  | ±                  | ±                                       | ±                                    | ±                   | ±                   | ±                      |                        | ±                      | ±          | ±       |
| PV (PDMS)    | 1.82              | 0.45              | 0.50              | 123.40             | 187                | 83.76                                   | 10.00                                | 3.89                | 3.41                | 3.82 x 10 <sup>6</sup> | 3.66 x 10 <sup>5</sup> | 2.1 x 10 <sup>6</sup>  | 0.21       | 0.14    |
|              | ±                 | ±                 | ±                 | ±                  | ±                  | ±                                       | ±                                    | ±                   | ±                   | ±                      |                        | ±                      | ±          | ±       |
| MD (PP)      | 4.70              | 19.50             | 7.15              | 104.33             | 380.00             | 142.67                                  | 343.33                               | 10.38               | 13.52               | 7.62 x 10 <sup>6</sup> | 9.50 x 10 <sup>5</sup> | 7.84 x 10 <sup>6</sup> | 6.92       | 7.97    |
|              | ±                 | ±                 | ±                 | ±                  | ±                  | ±                                       | ±                                    | ±                   | ±                   | ±                      |                        | ±                      | ±          | ±       |
| MD (PP)      | 1.81              | 1.97              | 1.22              | 55.30              | 265.14             | 25.70                                   | 106.93                               | 2.88                | 6.22                | 1.22 x 10 <sup>7</sup> | 1.48 x 10 <sup>6</sup> | 1.26 x 10 <sup>7</sup> | 0.73       | 0.81    |
|              | ±                 | ±                 | ±                 | ±                  | ±                  | ±                                       | ±                                    | ±                   | ±                   | ±                      |                        | ±                      | ±          | ±       |
| All trials   | 4.54              | 16.37             | 5.45              | 230.00             | 370.00             | 149.67                                  | 300.00                               | 10.36               | 12.20               | 1.51 x 10 <sup>7</sup> | 2.63 x 10 <sup>6</sup> | 1.60 x 10 <sup>7</sup> | 6.72       | 7.84    |
|              | ±                 | ±                 | ±                 | ±                  | ±                  | ±                                       | ±                                    | ±                   | ±                   | ±                      |                        | ±                      | ±          | ±       |
| All trials   | 1.82              | 3.89              | 2.44              | 154.85             | 160.93             | 49.52                                   | 100.00                               | 2.91                | 3.38                | 9.96 x 10 <sup>6</sup> | 6.18 x 10 <sup>6</sup> | 8.74 x 10 <sup>6</sup> | 0.45       | 0.47    |
|              | ±                 | ±                 | ±                 | ±                  | ±                  | ±                                       | ±                                    | ±                   | ±                   | ±                      |                        | ±                      | ±          | ±       |
| All trials   | 4.05              | 15.36             | 5.99              | 140.38             | 203.39             | 139.15                                  | 998.24                               | 9.54                | 13.07               | 7.63 x 10 <sup>6</sup> | 8.11 x 10 <sup>6</sup> | 8.11 x 10 <sup>6</sup> | 6.79       | 8.64    |
|              | ±                 | ±                 | ±                 | ±                  | ±                  | ±                                       | ±                                    | ±                   | ±                   | ±                      |                        | ±                      | ±          | ±       |
| All trials   | 1.46              | 2.97              | 1.49              | 153.01             | 142.57             | 54.54                                   | 739.62                               | 3.21                | 3.81                | 8.99 x 10 <sup>6</sup> | 9.43 x 10 <sup>6</sup> | 9.43 x 10 <sup>6</sup> | 0.43       | 0.61    |
|              | ±                 | ±                 | ±                 | ±                  | ±                  | ±                                       | ±                                    | ±                   | ±                   | ±                      |                        | ±                      | ±          | ±       |

COD (Chemical oxygen demand); TSS (Total suspended solids); TP (Total phosphorus); C (Conductivity); RO (Reverse Osmosis); PA-UREA (Polyamide-urea); PV (Pervaporation); PVA (Polyvinyl alcohol); PDMS (Polydimethylsiloxane); MD (Membrane distillation); PP (Polypropylene).

Table S4. Initial water flux

| Membrane process | Deionised water flux ( $J_0, L m^{-2} h^{-1}$ ) |
|------------------|-------------------------------------------------|
| RO (PA-UREA)     | 50.9                                            |
| PV (PVA)         | 0.34                                            |
| PV (PDMS)        | 0.06                                            |
| MD (PP)          | 0.08                                            |

RO (Reverse Osmosis); PA-UREA (Polyamide-urea); PV (Pervaporation); PVA (Polyvinyl alcohol); PDMS (Polydimethylsiloxane); MD (Membrane distillation); PP (Polypropylene).

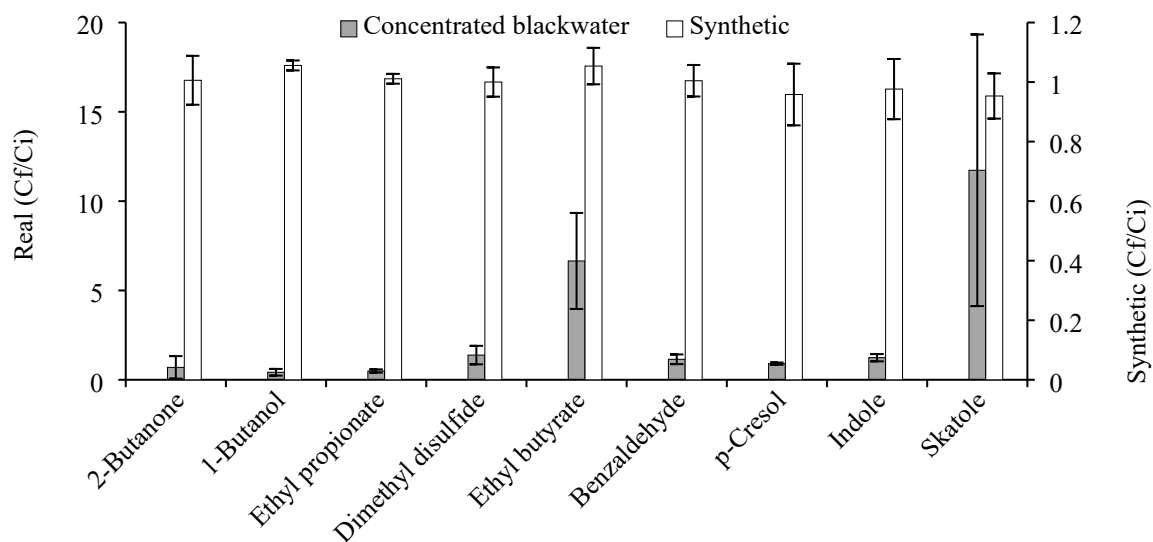

Figure S1. Feed odour development during storage, expressed as the ratio of the final feed concentration ( $C_f$ ) to the initial feed ( $C_i$ ) for pervaporation (polyvinyl alcohol) during concentrated blackwater trials and synthetic trials. Operated at 50 °C. Error bars represent standard deviation of a triplicated experiment. Mean filtration time 4.77 hours.

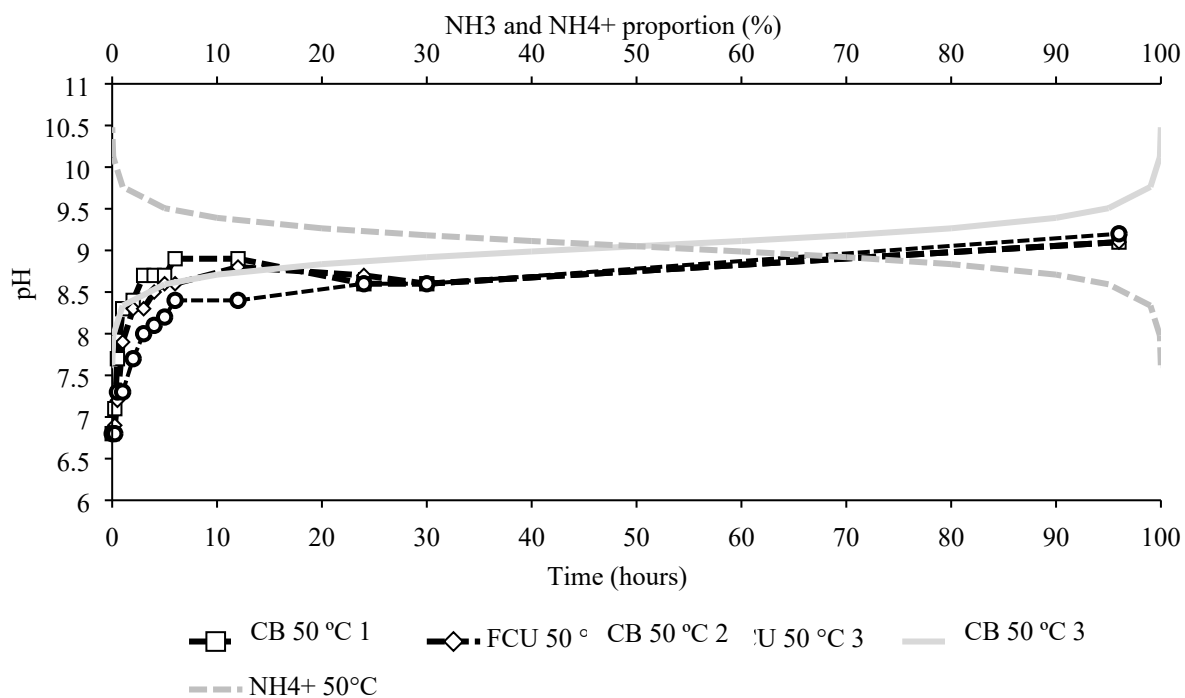

Figure S2. Transition of pH as a function of time for triplicated concentrated blackwater at 50 °C (CB 50 °C 1, CB 50 °C 2 and CB 50 °C 3). The equilibrium between NH<sub>3</sub> and NH<sub>4</sub><sup>+</sup> at 50 °C is overlaid.

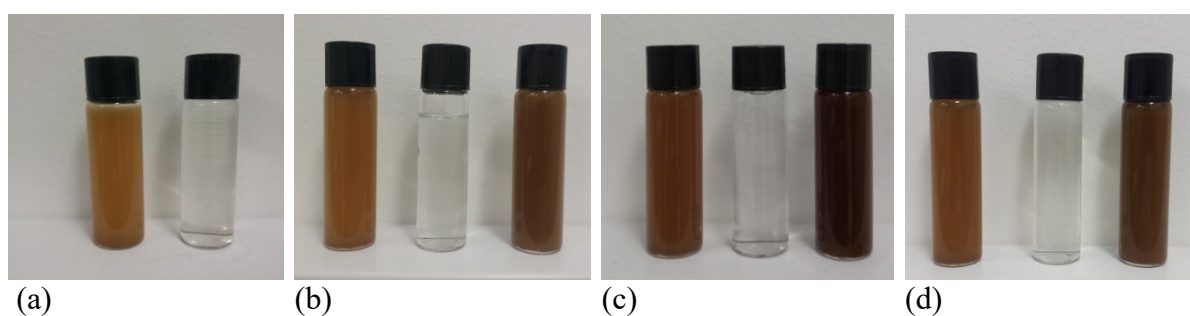

Figure S3. A visual comparison of the treatment of concentrated blackwater using membrane processes. (a) reverse osmosis feed and permeate (b) pervaporation (polyvinyl alcohol) feed, permeate and retentate (c) pervaporation (polydimethylsiloxane) feed permeate and retentate (d) membrane distillation feed, permeate and retentate.

### **Volatile organic compound detection and quantification (Mercer et al., 2019)**

Solid phase extraction (SPE) Oasis® HLB cartridges (1 g), sourced from Waters (Milford, USA), were attached to an Agilent VacElut20 manifold (Agilent Technologies, Stockport, UK). The cartridges were first conditioned by subsequently passing 10 mL of diethyl ether, methanol and deionised water, facilitated by a vacuum pump (N 022 AN.18, KNF Neuberger, Whitney, UK). Samples (20 mL) were then loaded onto the cartridges. The VOCs were eluted with 1 mL of methyl octanoate (IS) in diethyl ether ( $0.057 \mu\text{g mL}^{-1}$ ) followed by 5 mL of pure diethyl ether. The residual sample water which collected at the bottom of the beaker was removed carefully using a glass Pasteur pipette (Fisher Scientific, Loughborough, UK). Diethyl ether extracts were concentrated to 0.5 mL under nitrogen gas and then analysed by GC-MS.

Compound identification and quantification were performed by a Shimadzu-TQ8040 GC-MS (Shimadzu, Milton Keynes, UK), equipped with a semi polar ZB-624 fused silica GC column  $60 \text{ m} \times 0.25 \text{ mm}$ ,  $1.4 \mu\text{m}$  (Phenomenex, Macclesfield, UK). The initial oven temperature was held at  $35 \text{ }^\circ\text{C}$  for 5 min then increased to  $170 \text{ }^\circ\text{C}$  at a rate of  $10 \text{ }^\circ\text{C min}^{-1}$  to elute 1-propanol, 2-butanone, 1-butanol, ethyl propionate, dimethyl disulfide, and ethyl butyrate. This temperature was sustained for 2 min to provide separation between dimethyl trisulfide, benzaldehyde and limonene. Then the temperature was ramped at  $30 \text{ }^\circ\text{C min}^{-1}$  up to  $240 \text{ }^\circ\text{C}$  for the detection of the internal standard (methyl octanoate) and p-cresol and further increased to  $250 \text{ }^\circ\text{C}$  at  $5 \text{ }^\circ\text{C min}^{-1}$ , which was maintained for 5 min, allowing for the separation of indole and skatole. The total runtime was 29.83 min. Helium was used as the carrier gas (236.1 kPa) at a linear column flow rate of  $2.47 \text{ mL min}^{-1}$  to maintain a velocity of  $40 \text{ cm s}^{-1}$ . The mass spectrometer was operated in single quad mode with a detector voltage relative to the tuning result (0.2 kV), ionisation energy of  $-70 \text{ eV}$  at an ion source temperature of  $200 \text{ }^\circ\text{C}$  and interface temperature of  $250 \text{ }^\circ\text{C}$ . A solvent cut time was applied until 8.95 min.

## **References**

E. Mercer, C. J. Davey, P. Campo, D. Fowler, L. Williams, A. Kolios, A. Parker, S. Tyrrel, C. Walton, E. Cartmell, M. Pidou and E. J. McAdam, Quantification of liquid phase faecal odourants to evaluate membrane technology for wastewater reuse from decentralised sanitation facilities, *Environ. Sci. Water Res. Technol.*, , DOI:10.1039/C8EW00693H.
